# Supplementary material for: Vitamin B12 status in women of childbearing age in the UK and its relationship with national nutrient intake guidelines: results from two National Diet and Nutrition Surveys
Source: PubMed Central journal article supplement (PMC4985863; doi:10.1136/bmjopen-2016-011247), 2016-08-12
Supplement: bmjopen-2016-011247supp_figures.pdf [file bmjopen-2016-011247supp_figures.pdf]

## Supplementary Figures

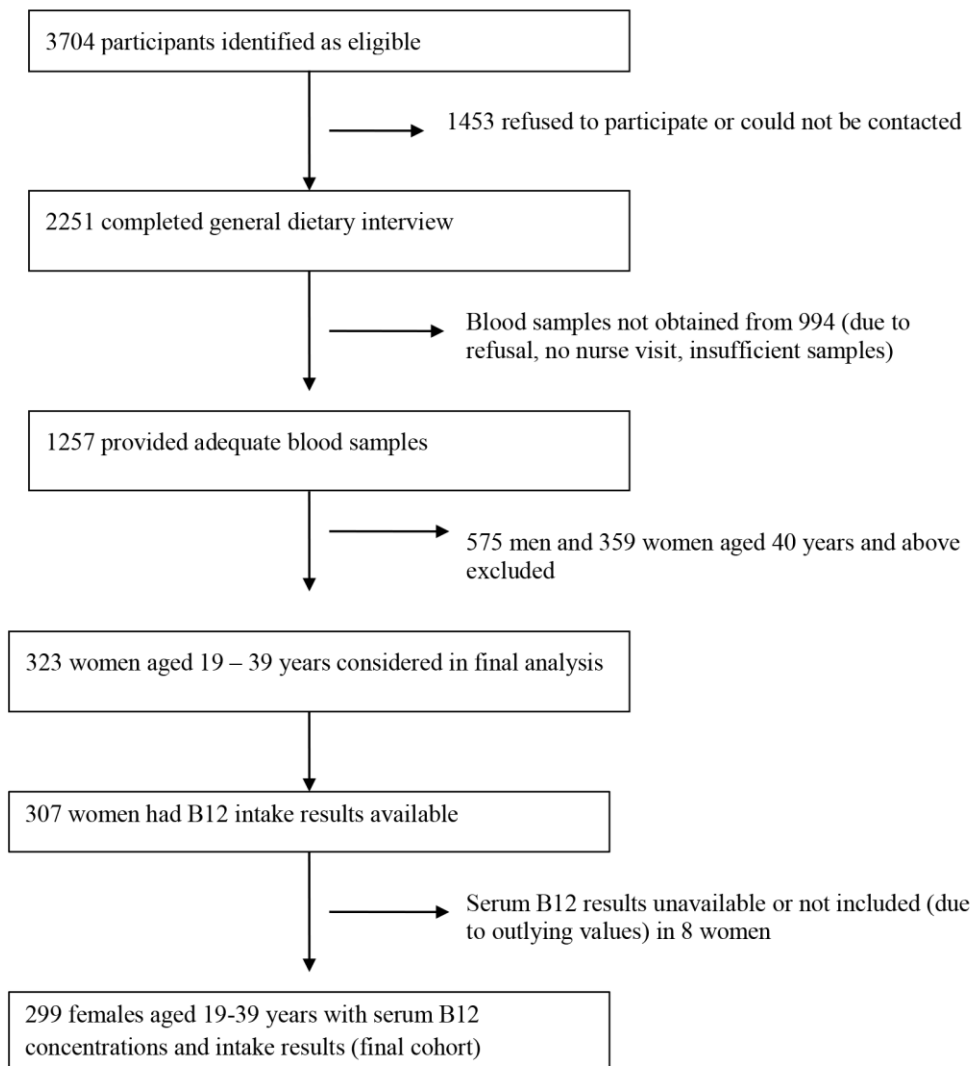

**Supplementary Figure 1** Flow diagram illustrating the selection of the final cohort in the NDNS 2000/01 survey

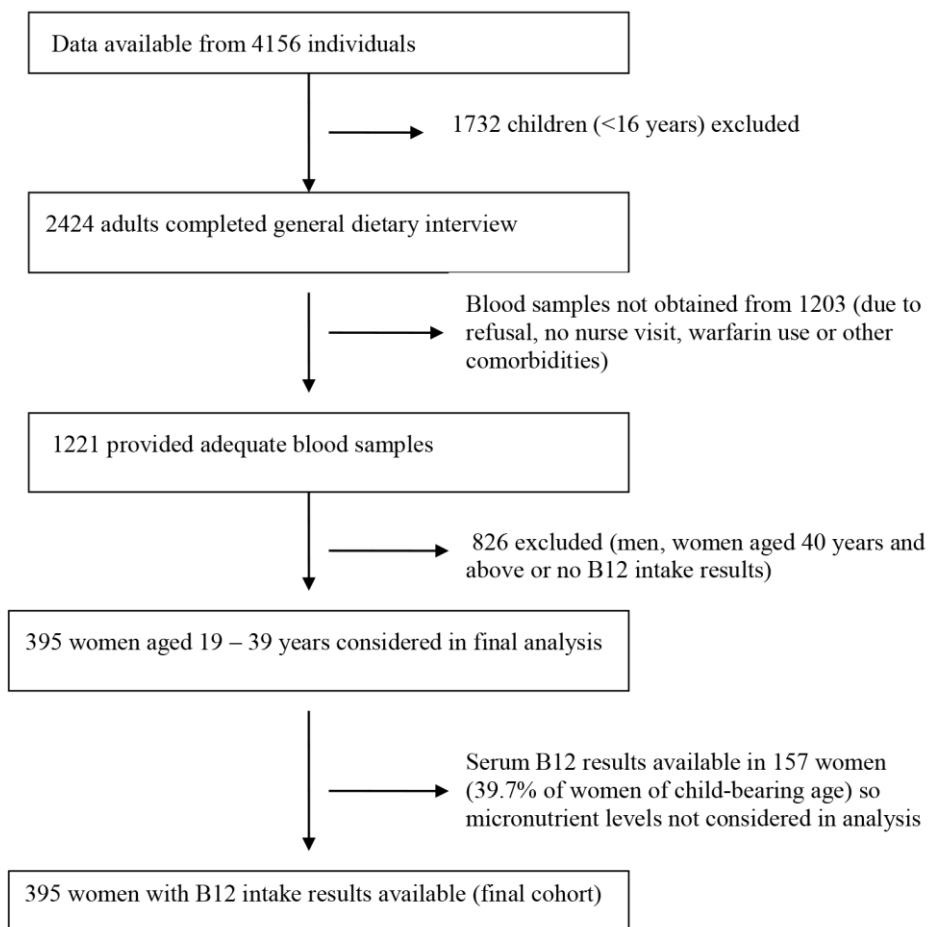

**Supplementary Figure 2** Flow diagram illustrating the selection of the final cohort in the NDNS 2008/12 survey
