# Supplementary material for: Vitamin B12 status in women of childbearing age in the UK and its relationship with national nutrient intake guidelines: results from two National Diet and Nutrition Surveys
Source: PubMed Central journal article supplement (PMC4985863; doi:10.1136/bmjopen-2016-011247), 2016-08-12
Supplement: bmjopen-2016-011247supp_table.pdf [file bmjopen-2016-011247supp_table.pdf]

**Supplementary Table 1** Biochemical indices in vegetarian and vegan women of child-bearing age compared to non-vegetarians

|                                             | <b>Vegetarian / vegan</b>      | <b>Non-vegetarian</b> | <b>P<sup>a</sup></b> |
|---------------------------------------------|--------------------------------|-----------------------|----------------------|
| Number (%)                                  | 26 (8.7)                       | 273 (91.3)            | NS                   |
| B12 supplements taken, n (%)                | 5 (19.2)                       | 26 (9.5)              | NS                   |
| B12 intake, diet only (mcg/day)             | 2.95 (2.63, 3.96) <sup>b</sup> | 3.87 (2.81, 5.09)     | NS                   |
| B12 intake, diet + supplements (mcg/day)    | 3.07 (2.65, 4.37)              | 3.92 (2.86, 5.30)     | NS                   |
| Serum B12 (pmol/L)                          | 192.0 (138.9, 248.2)           | 248.3 (190.5, 328.3)  | <0.01                |
| B12 insufficiency (<150pmol/L), n (%)       | 8 (30.8)                       | 28 (10.3)             | <0.01                |
| Folic acid supplements taken, n (%)         | 3 (11.5)                       | 29 (10.6)             | NS                   |
| Folate intake, diet only (mcg/day)          | 279.2 (234.6, 324.0)           | 232.2 (169.3, 292.0)  | <0.05                |
| Folate intake, diet + supplements (mcg/day) | 284.2 (234.6, 337.5)           | 233.9 (175.8, 310.2)  | NS                   |
| Serum folate (nmol/L)                       | 21.8 (18.5, 30.8)              | 19.2 (13.8, 26.2)     | <0.05                |
| Serum folate deficiency (<10nmol/L), n (%)  | 1 (3.8)                        | 17 (6.3)              | NS                   |
| Homocysteine (umol/L)                       | 9.60 (7.74, 11.90)             | 9.24 (7.63, 11.46)    | NS                   |
| High Hcy (>12 umol/L), n (%)                | 5 (19.2)                       | 57 (21.3)             | NS                   |
| High Hcy (>15 umol/L), n(%)                 | 1 (3.8)                        | 23 (8.6)              | NS                   |

a: Comparison between vegetarian/vegan and non-vegetarian groups. For categorical variables, Student's t-test was used (after log-transformation); for continuous variables Fisher's exact test was used

b: Median, 25th -75th centile in parentheses (all such values)

NS: not significant
